# Supplementary material for: GSK3β regulates a novel β-Catenin degradation pathway via the GID complex in Wnt signaling.
Source: Research Square preprint supplement (doi:10.21203/rs.3.rs-7182831/v1), 2025-08-05
Supplement: Supplementary file 1 [file 3a42cf808afd341b93ac4340.pdf]

## **Supplementary information**

**GSK3 $\beta$  regulates a novel  $\beta$ -Catenin degradation pathway via the GID complex in Wnt signaling.**

**Masahiro Shimizu and Hiroshi Shibuya**

## Supplementary Figure 1

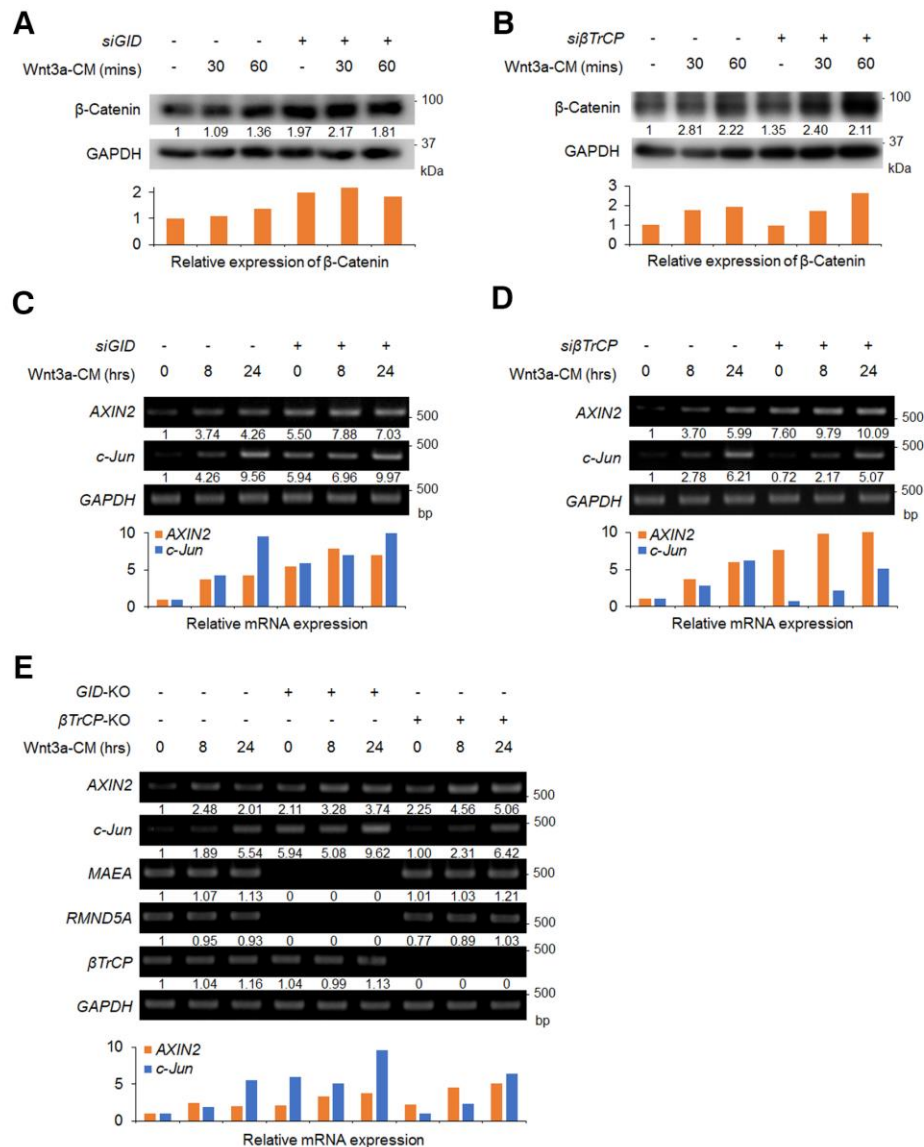

**Supplementary Figure 1. Expression of  $\beta$ -Catenin and Wnt target genes in *GID* genes- or  *$\beta$ TrCP* genes-suppressed cells.**

**A** and **B**, Immunoblotting of  $\beta$ -Catenin in HEK293T cells after transfection of MAEA and RMND5A siRNA (*siGID*, **A**) or  $\beta$ TRCP and FBXW11 siRNA (*si $\beta$ TrCP*, **B**) for 48h and treatment of Wnt3a-CM for indicated times. **C** and **D**, RT-PCR analysis of Wnt target genes after transfection of *siGID* or *si $\beta$ TrCP* for 24h and Wnt3a-CM for indicated times.

**E,** Expression of Wnt target genes in *MAEA*- and *RMND5A*-knockout (*GID*-KO) or *βTrCP*-knockout (*βTrCP*-KO) HEK293T cells after treatment of Wnt3a-CM.

## Supplementary Figure 2

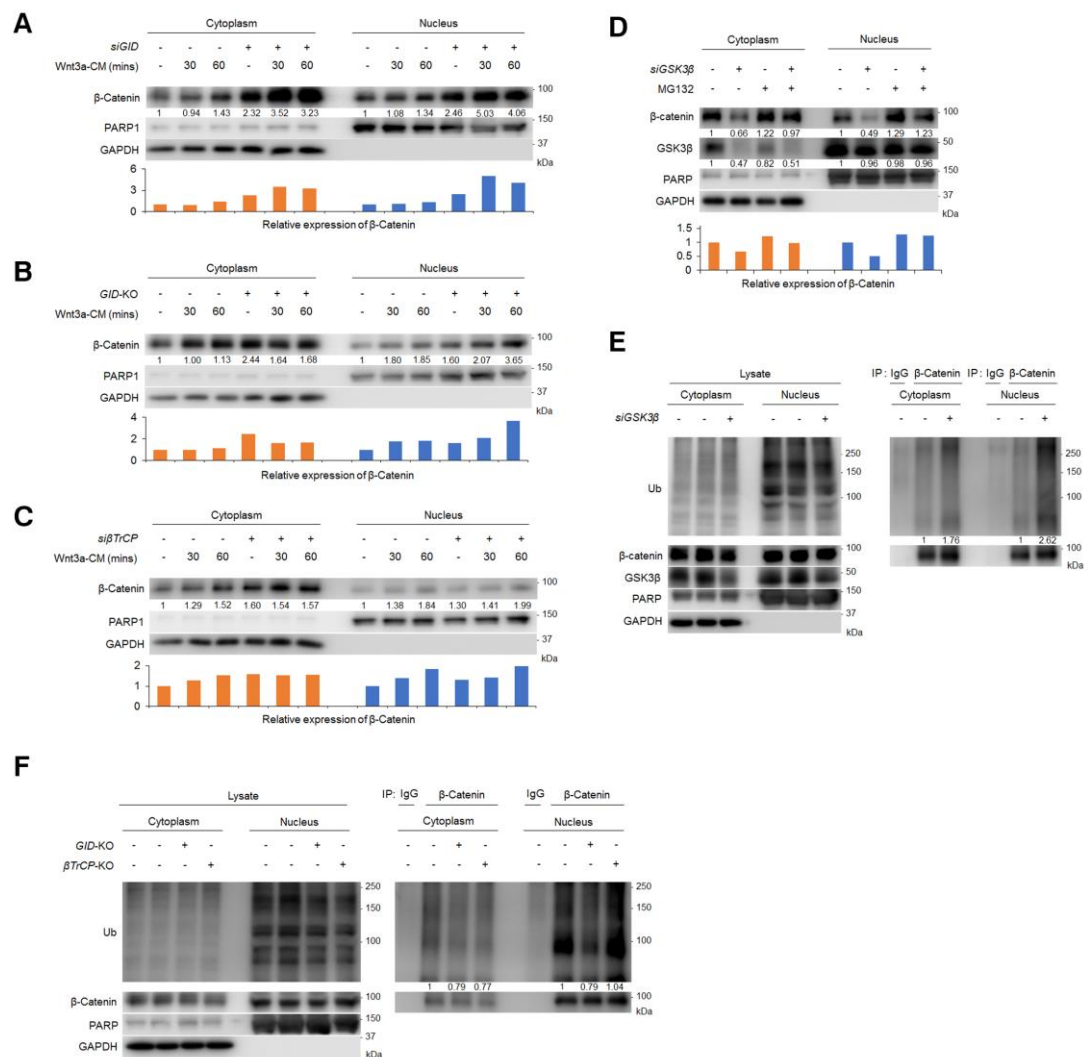

**Supplementary Figure 2. Expression and ubiquitination of β-Catenin in cytoplasm and nucleus of *GID* genes- or *βTrCP* genes-suppressed cells.**

**A**, Western blot analysis of β-Catenin in cytoplasm and nucleus of HEK293T cells after transfection of MAEA and RMND5A siRNA (*siGID*) for 48h and treatment of Wnt3a-CM for indicated times. **B**, Immunoblotting of β-Catenin in cytoplasm and nucleus of *GID*-KO cells with Wnt3a-CM stimulation. **C**, Western blot analysis of β-Catenin in cytoplasm and nucleus of HEK293T cells after transfection of βTRCP and FBXW11 siRNA (*siβTrCP*) for 48h and treatment of Wnt3a-CM for indicated times. **D** and **E**,

Expression (D) and ubiquitination (E) of  $\beta$ -Catenin in cytoplasm and nucleus after treatment GSK3 $\beta$  siRNA for 48h and MG132 (20mM) for 8h. F, Ubiquitination levels of endogenous  $\beta$ -Catenin in cytoplasm and nucleus of *GID*-KO or  $\beta$ TrCP-KO cells after treatment MG132 (50mM) for 4h.

**Supplementary Figure 3**

**A**

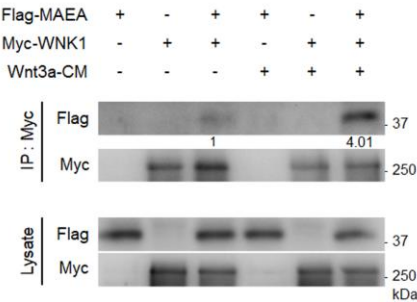

**B**

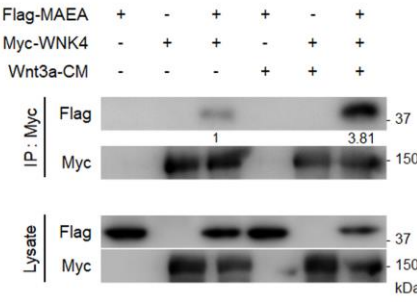

**C**

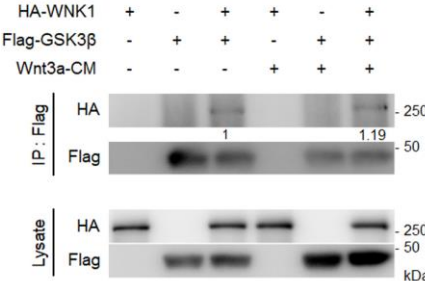

**D**

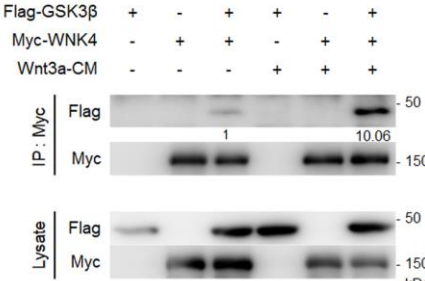

**Supplementary Figure 3. Interaction of WNK1 and WNK4 with MAEA and GSK3 $\beta$ .**

**A** and **B**, Binding assay of WNK1 (**A**) or WNK4 (**B**) to MAEA after treatment of Wnt3a-CM for 4h. **C** and **D**, Interaction between GSK3 $\beta$  and WNK1 (**C**) or WNK4 (**D**) after treatment of Wnt3a-CM for 4h.
